# Supplementary material
Source: PubMed Central journal article supplement (PMC3260060)
Supplement: supp_jn.111.145375_nut145375-SF1.pdf [file supp_jn.111.145375_nut145375-SF1.pdf]

## Online Supporting Material

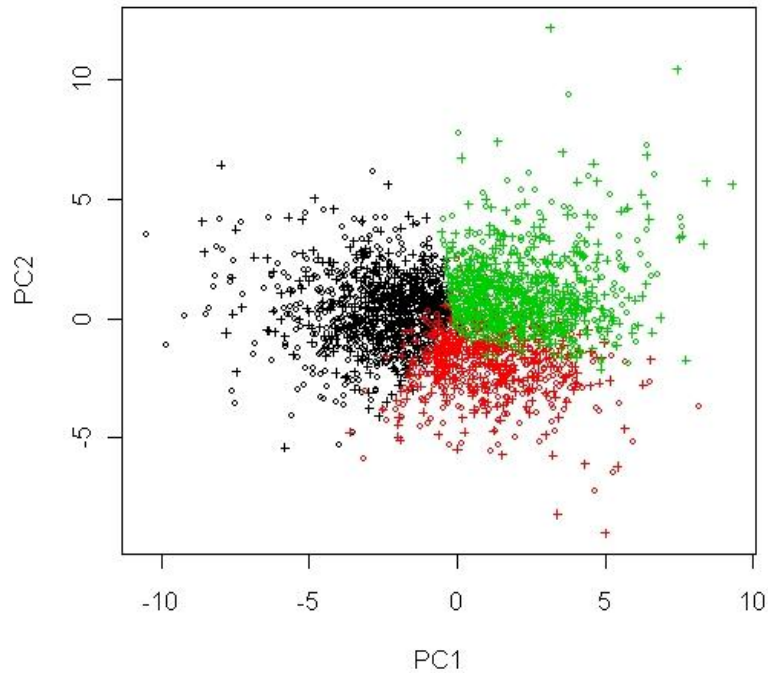

**Supplemental Figure 1.** Graphic representation of the three Diet Clusters on the space spanned by the first two principal components. Green = Diet **Cluster 1**; Red = Diet **Cluster 2**; Black = Diet **Cluster 3**. Circles represent CHD cases and **crosses** represent controls. The first and second principal components (PC1 and PC2) **accounted** for 30% and 15% **of the variation**, respectively.
